# Supplementary material
Source: PubMed Central journal article supplement (PMC3049381)
Supplement: JCI43273sd.pdf [file JCI43273sd.pdf]

## **Online Supplemental Material**

### **Cell Counts**

Differential murine peripheral blood cell counts were determined by Coulter counter (Leeds Veterinary School, UK)

### **Murine neutrophil glucose and ATP assays**

For glucose analysis, neutrophils were cultured for 2 hours at  $1 \times 10^6$ /ml in pre-equilibrated (normoxia vs hypoxia) serum free media, recovered, washed and lysed in pre-equilibrated buffer (40mM HEPES, 150mM KCL, 0.05% P-40). [Glucose] in cell lysates was determined by colorimetric assay using a glucose HK assay kit, as per manufacturer's instructions. For ATP analysis neutrophils were cultured at  $0.2 \times 10^6$ /ml and at each time point directly lysed ( $0.2 \times 10^5$ ) in 50 $\mu$ l tumor lysis buffer (Ammonium meta-vanadate, Hepes, Triton X). Lysates were subsequently incubated with Luciferin-luciferase reagent (Innovative Diagnostik Systeme) and samples read by luminometer (MPLX, Berthold Diagnostic Systems) against an ATP standard curve, with light output directly proportional to [ATP].

### **Apoptosis assays**

Flow cytometric analysis (FACSCalibur™, Becton Dickinson) of PE-conjugated Annexin V (BD Pharmingen™) and To-Pro®-3 (Molecular Probes) staining was performed as previously described (28). Caspase activity was measured by detection of cleavage of a fluorescent caspase substrate FITC-VAD (Molecular Probes, Invitrogen) as previously described (Marriott et al., 2004).

Marriott HM, Ali F, Read RC, Mitchell TJ, Whyte MK, Dockrell DH. Nitric oxide levels regulate macrophage commitment to apoptosis or necrosis during pneumococcal infection. *FASEB J*. 2004;18:1126-1128.

**Supplementary Table 1 Transcripts showing 2 fold or greater decrease in abundance in hypoxic PHD3-/- neutrophils compared to WT controls.**

| Log FC              | PPLR     | Gene Title                                               |
|---------------------|----------|----------------------------------------------------------|
| <b>-4.002544296</b> | 0.00049  | EGL nine homolog 3 (C. elegans)                          |
| <b>-3.660739691</b> | 1.00E-06 | EGL nine homolog 3 (C. elegans)                          |
| <b>-2.562627179</b> | 0.0007   | inactive X specific transcripts                          |
| <b>-2.395124508</b> | 0.011826 | inactive X specific transcripts                          |
| <b>-2.054470585</b> | 1.93E-05 | Spi-C transcription factor (Spi-1/PU.1 related)          |
| <b>-1.730112135</b> | 0.000955 | guanylate binding protein 6                              |
| <b>-1.723701728</b> | 0.000405 | interleukin 18 receptor 1                                |
| <b>-1.603144173</b> | 0.003028 | galactosidase, alpha                                     |
| <b>-1.597289988</b> | 0.009287 | BTB and CNC homology 1                                   |
| <b>-1.574272782</b> | 0.000128 | fatty acid binding protein 4, adipocyte                  |
| <b>-1.492353593</b> | 0.000351 | G-protein signalling modulator 1 (AGS3-like, C. elegans) |
| <b>-1.440153231</b> | 0.001066 | solute carrier family 30 (zinc transporter), member 1    |
| <b>-1.395755974</b> | 0.000254 | Interleukin 1 receptor accessory protein-like 2          |
| <b>-1.377239746</b> | 0.001827 | serum response factor                                    |
| <b>-1.373146135</b> | 0.000631 | cytoplasmic polyadenylation element binding protein 2    |
| <b>-1.36531521</b>  | 0.002668 | jumonji, AT rich interactive domain 1A (Rbp2 like)       |
| <b>-1.330614168</b> | 0.005278 | Aminolevulinic acid synthase 1                           |
| <b>-1.321529759</b> | 0.004646 | DnaJ (Hsp40) homolog, subfamily C, member 2              |
| <b>-1.3169723</b>   | 0.01365  | lymphocyte antigen 9                                     |
| <b>-1.294465871</b> | 0.000366 | Spi-C transcription factor (Spi-1/PU.1 related)          |
| <b>-1.277480127</b> | 0.000952 | NACHT, leucine rich repeat and PYD containing 4C         |
| <b>-1.275345305</b> | 0.015897 | DEAD (Asp-Glu-Ala-Asp) box polypeptide 10                |
| <b>-1.246186455</b> | 0.002429 | MAM domain containing 1                                  |
| <b>-1.229611668</b> | 0.010458 | solute carrier family 25, member 44                      |
| <b>-1.226613832</b> | 0.003546 | breast cancer 1                                          |

---

|                     |          |                                                                                    |
|---------------------|----------|------------------------------------------------------------------------------------|
| <b>-1.225736305</b> | 0.003292 | patatin-like phospholipase domain containing 1                                     |
| <b>-1.212334951</b> | 0.004345 | hyaluronan mediated motility receptor (RHAMM)                                      |
| <b>-1.201089967</b> | 0.010207 | kinesin family member 1B                                                           |
| <b>-1.178638216</b> | 0.002367 | anti-Mullerian hormone type 2 receptor                                             |
| <b>-1.169951585</b> | 0.003071 | WD repeat domain 75                                                                |
| <b>-1.166363855</b> | 0.000688 | solute carrier family 20, member 1                                                 |
| <b>-1.164771366</b> | 0.001533 | oligonucleotide/oligosaccharide-binding fold containing 2A                         |
| <b>-1.161822411</b> | 0.036751 | ribonuclease, RNase A family, 6                                                    |
| <b>-1.161507124</b> | 0.009264 | Myocyte enhancer factor 2A                                                         |
| <b>-1.105808437</b> | 0.000711 | jumonji, AT rich interactive domain 1A (Rbp2 like)                                 |
| <b>-1.101601052</b> | 0.001205 | wingless-related MMTV integration site 5A                                          |
| <b>-1.097561822</b> | 0.05912  | G protein-coupled receptor 107                                                     |
| <b>-1.086726232</b> | 0.044066 | UDP-N-acetyl-alpha-D-galactosamine:polypeptide N-acetylgalactosaminyltransferase 2 |
| <b>-1.085498546</b> | 0.005698 | transmembrane protein 170                                                          |
| <b>-1.074945718</b> | 0.014539 | histone cluster 2, H3c1                                                            |
| <b>-1.072501734</b> | 0.013116 | coiled-coil domain containing 122                                                  |
| <b>-1.066100576</b> | 0.020376 | DPH3 homolog (KTI11, <i>S. cerevisiae</i> )                                        |
| <b>-1.062907017</b> | 0.004907 | glutaminyl-tRNA synthase (glutamine-hydrolyzing)-like 1                            |
| <b>-1.056764651</b> | 0.002531 | lipoma HMGIC fusion partner-like 2                                                 |
| <b>-1.049399075</b> | 0.065697 | Ras interacting protein 1                                                          |
| <b>-1.04573322</b>  | 0.004191 | splicing factor 3a, subunit 3                                                      |
| <b>-1.04547089</b>  | 0.022613 | F-box protein 34                                                                   |
| <b>-1.044333421</b> | 0.018758 | tubulointerstitial nephritis antigen-like                                          |
| <b>-1.043751385</b> | 0.002386 | zeta-chain (TCR) associated protein kinase                                         |
| <b>-1.025538336</b> | 0.017964 | Thioredoxin-like 2                                                                 |
| <b>-1.016423647</b> | 0.030642 | inhibitor of DNA binding 2                                                         |
| <b>-1.012245469</b> | 0.001591 | inner membrane protein, mitochondrial                                              |
| <b>-1.007133936</b> | 0.040876 | RGM domain family, member A                                                        |

---

---

|                     |          |                                 |
|---------------------|----------|---------------------------------|
| <b>-1.005076582</b> | 0.016875 | frizzled homolog 3 (Drosophila) |
|---------------------|----------|---------------------------------|

|                     |          |                     |
|---------------------|----------|---------------------|
| <b>-1.004819081</b> | 0.020861 | interleukin 1 alpha |
|---------------------|----------|---------------------|

---

Gene array. cDNA from wildtype and PHD3<sup>-/-</sup> neutrophils aged for 4 hours in hypoxia was run on Affymetrix whole mouse gene array chips in n=3 independent experiments. Individual arrays were normalised and log fold change in transcript abundance determined for PHD3<sup>-/-</sup> compared to wild-type cells by panther analysis. For each gene PPLR values determine the probability of the estimated fold change being close to the determined values. Genes showing a greater than 2 fold decrease are listed in order of magnitude of response. Geo accession number GSE26023.

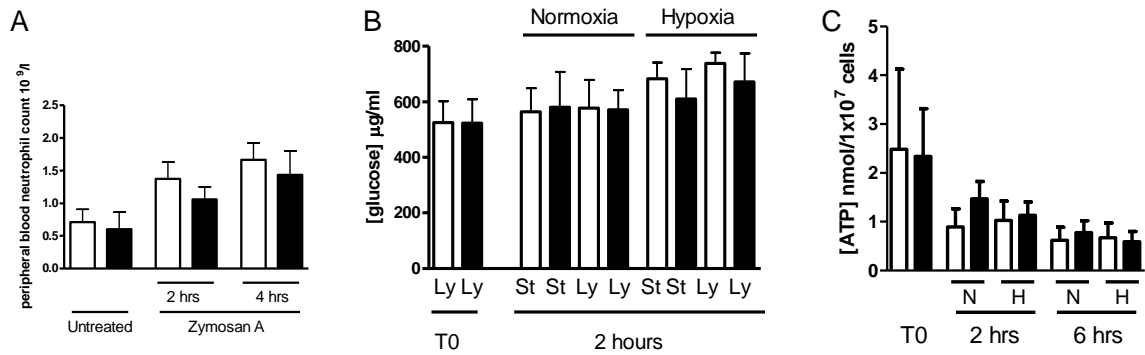

**Supplemental Figure 1. Normal neutrophil numbers and metabolism in *Phd3* null mice.** (A) Peripheral blood counts. Peripheral blood samples were obtained by terminal IVC bleeds from wild type (open bars) and *Phd3*<sup>-/-</sup> animals (filled bars) 2 and 4 hrs following the installation of intra-peritoneal zymosan and in aged matched untreated animals. Differential cell counts were performed by Coulter counter (n=5). (B) Intra- and extra-cellular [glucose] measurement. Murine peripheral blood PMN isolated from wild type (open bars) and *Phd3* null (filled bars) animals were cultured for 2 hours in normoxia and hypoxia and [glucose] determined in whole cell lysates (Ly) and supernatants (St) by colorimetric assay (n=7). (C) ATP analysis. Murine peripheral blood PMN isolated from wild type (open bars) and *Phd3*<sup>-/-</sup> (filled bars) animals were cultured for 2 or 6 hours in normoxia (N) and hypoxia (H), cells lysed and [ATP] determined against a standard curve by luminometry (n=3).

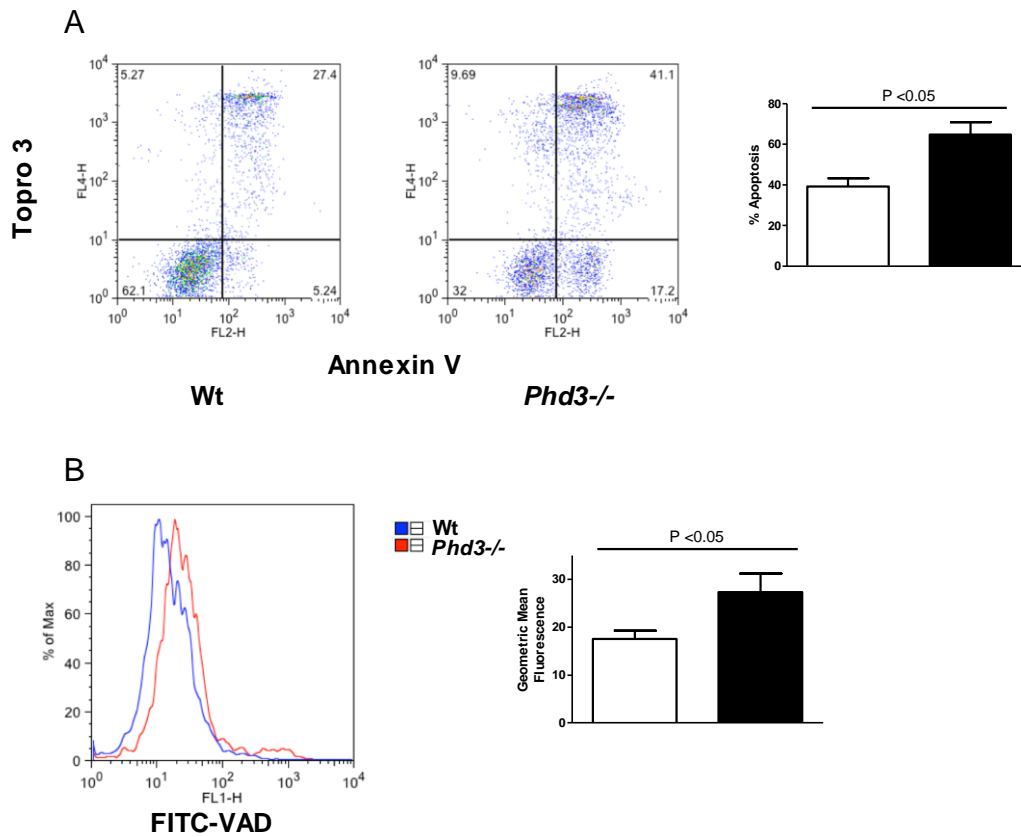

**Supplemental Figure 2. Hypoxia delays apoptosis of wildtype but not *Phd3*<sup>-/-</sup> neutrophils.** Murine peripheral blood PMN were isolated from WT (open bar) and *Phd3*<sup>-/-</sup> (filled bar) animals. PMN were cultured in normoxia or hypoxia for 6 h. (A) Representative dot plots are shown for Annexin V and ToPro3 staining for wild-type and *Phd3*<sup>-/-</sup> neutrophils cultured in hypoxia. Mean data for WT (open bars) and PHD3<sup>-/-</sup> (filled bars) cells (n=4). (B) Representative histograms are shown for wild-type (blue line) vs *Phd3*<sup>-/-</sup> neutrophils (red line) FITC VAD fluorescence (n=4).

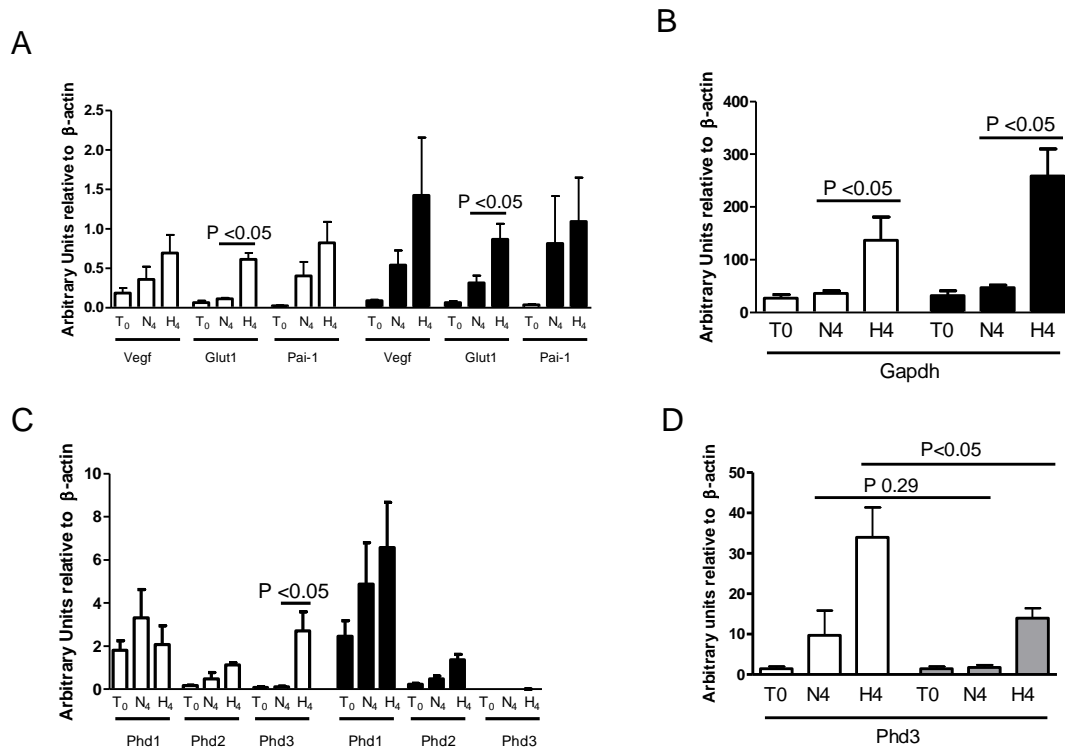

**Supplemental Figure 3. Preservation of Hif transcriptional activity and Phd isoform expression in *Phd3*<sup>-/-</sup> neutrophils.** (A) Hif targets. cDNA from freshly isolated murine peripheral blood PMN and PMN aged for 4 hours in either normoxia (N) or hypoxia (H) was analysed by TaqMan for *Vegf*, *Glut1* and *Pai-1* transcript abundance relative to  $\beta$ -actin in both WT (open bars) and *Phd3*<sup>-/-</sup> (filled bars) cells (n=5). (B) Expression of *Gapdh* transcript was similarly evaluated (n=5). (C) PHD enzymes. cDNA from freshly isolated murine peripheral blood PMN and PMN aged for 4 hours in either normoxia (N) or hypoxia (H) was analysed by TaqMan for *Phd1*, *Phd2* and *Phd3* transcript abundance relative to  $\beta$ -actin in both WT (open bars) and *Phd3*<sup>-/-</sup> (filled bars) cells (n=5). (D) *Phd3* and *Hif-1α*<sup>-/-</sup>. cDNA from freshly isolated murine peripheral blood PMN and PMN aged for 4 hours in either normoxia (N) or hypoxia (H) was analysed by TaqMan for *Phd3* transcript abundance relative to  $\beta$ -actin in both WT (open bars) and *Hif-1α*<sup>-/-</sup> (filled bars) cells (n=4).
